# Supplementary material for: Resonant Rayleigh light scattering response of individual Au nanoparticles to antigen–antibody interaction
Source: Royal Society of Chemistry journal article supplement (doi:10.1039/b901327j), 2009-01-01
Supplement: b901327j.pdf [file b901327j.pdf]

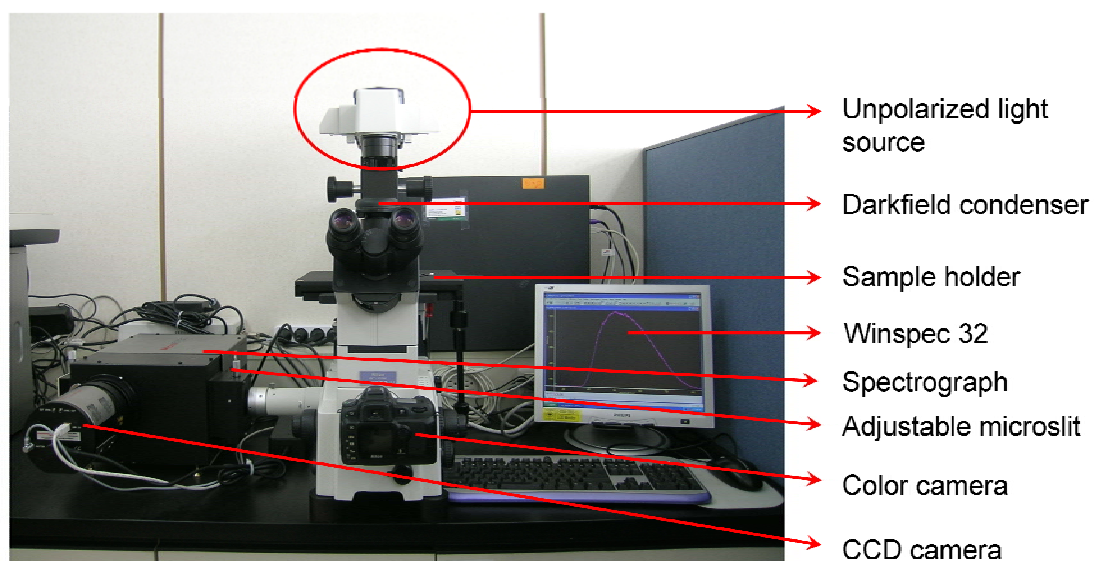

**Figure:** The colour photograph of the system setup for study of resonant Rayleigh light-scattering response of individual Au nanoparticles.
